# Supplementary material for: Tracking of Host Defenses and Phylogeny During the Radiation of Neotropical Inga-Feeding Sawflies (Hymenoptera; Argidae)
Source: Front Plant Sci. 2018 Aug 23;9:1237. doi: 10.3389/fpls.2018.01237 (PMC6116116; doi:10.3389/fpls.2018.01237)
Supplement: TABLE S1 — List of compounds putatively identified through matches to reference MSMS spectra on the Global Natural Products Social Molecular Networking database (https://gnps.ucsd.edu/ProteoSAFe/static/gnps-splash.jsp). The cosine score is a measure of the similarity of MS/MS-derived fragments between two compounds. [file Table_1.XLSX]

## Sheet: Hoja1
m/z	Retention time (minutes)	Compound name	Reference spectrum source	Cosine score
243.062	1.35	URIDINE	Alexandrov Theodore	0.9
282.083	1.64	GUANOSINE	Alexandrov Theodore	0.91
209.032	2.91	GALACTARATE	Alexandrov Theodore	0.86
305.066	3.75	Epigallocatechin	Norberto Lopes	0.95
483.078	4.81	NCGC00169402-02!2-(3,4-dihydroxyphenyl)-5,7-dihydroxy-6-[3,4,5-trihydroxy-6-(hydroxymethyl)oxan-2-yl]chromen-4-one	Jadhav/Dorrestein	0.76
203.082	5.17	Spectral Match to L-Tryptophan from NIST14	Data from Kevin Bush	0.92
209.03	5.41	GALACTARATE	Alexandrov Theodore	0.81
196.061	5.54	3,4-DIHYDROXY-L-PHENYLALANINE	Alexandrov Theodore	0.9
209.03	5.95	GALACTARATE	Alexandrov Theodore	0.91
483.077	6.12	NCGC00380553-01![3,4,5-trihydroxy-6-(3,4,5-trihydroxybenzoyl)oxyoxan-2-yl]methyl 3,4,5-trihydroxybenzoate	Jadhav/Dorrestein	0.72
305.065	6.63	Epigallocatechin	Norberto Lopes	0.95
209.029	6.76	GALACTARATE	Alexandrov Theodore	0.88
577.134	6.76	ReSpect:PT204590 Procyanidin B1|(-)-Epicatechin-(4-beta-8)-(+)-catechin|cis,trans''-4,8''-Bi-(3,3',4',5,7-pentahydroxyflavane)|(2R,3R,4R)-2-(3,4-dihydroxyphenyl)-4-[(2R,3S)-2-(3,4-dihydroxyphenyl)-3,5,7-trihydroxychro	Putative ReSpect Match	0.84
289.071	6.96	ReSpect:PT204560 (+)-Epicatechin|EpCt-pl|ent-Epicatechin|Epicatechol|(+)-3,3',4',5,7-Pentahydroxyflavan|(2S,3S)-2-(3,4-dihydroxyphenyl)chroman-3,5,7-triol	Putative ReSpect Match	0.95
191.055	7.23	Quinic Acid	Ricardo M Borges	0.63
577.136	7.34	ReSpect:PT204590 Procyanidin B1|(-)-Epicatechin-(4-beta-8)-(+)-catechin|cis,trans''-4,8''-Bi-(3,3',4',5,7-pentahydroxyflavane)|(2R,3R,4R)-2-(3,4-dihydroxyphenyl)-4-[(2R,3S)-2-(3,4-dihydroxyphenyl)-3,5,7-trihydroxychro	Putative ReSpect Match	0.69
447.093	7.72	ReSpect:PT208360 cyanidin-3-glucoside chloride|Cynd-3-Glc|Kuromanin|Asterin|Chrysanthemin|Chrysontemin|Glucocyanidin|Cyanidin 3-beta-glucopyranoside|3,3',4',5,7-Pentahydroxyflavylium chloride, 3-glucoside|(2S,3R,4S,5S	Putative ReSpect Match	0.89
289.071	7.74	MoNA:2871079 (+/-)-Catechin	MoNA	0.65
577.134	8.05	ReSpect:PT204580 Procyanidin B2|(-)-Epicatechin-(4-beta-8)-(-)-epicatechin|4,8'-Bi((+)-epicatechin))|cis,cis'-4,8'-Bi(3,3',4',5,7-pentahydroxyflavane)|(2R,3R,4R)-2-(3,4-dihydroxyphenyl)-4-[(2R,3R)-2-(3,4-dihydroxyphen	Putative ReSpect Match	0.89
447.092	8.24	ReSpect:PT208360 cyanidin-3-glucoside chloride|Cynd-3-Glc|Kuromanin|Asterin|Chrysanthemin|Chrysontemin|Glucocyanidin|Cyanidin 3-beta-glucopyranoside|3,3',4',5,7-Pentahydroxyflavylium chloride, 3-glucoside|(2S,3R,4S,5S	Putative ReSpect Match	0.88
289.071	8.52	ReSpect:PT204560 (+)-Epicatechin|EpCt-pl|ent-Epicatechin|Epicatechol|(+)-3,3',4',5,7-Pentahydroxyflavan|(2S,3S)-2-(3,4-dihydroxyphenyl)chroman-3,5,7-triol	Putative ReSpect Match	0.95
595.166	8.53	NCGC00384752-01!5,7-dihydroxy-2-(4-hydroxyphenyl)-6,8-bis[3,4,5-trihydroxy-6-(hydroxymethyl)oxan-2-yl]-2,3-dihydrochromen-4-one	Jadhav/Dorrestein	0.66
477.066	8.63	NCGC00385459-01!(3R,4R,5R)-3-hydroxy-4,5-bis[(3,4,5-trihydroxybenzoyl)oxy]cyclohexene-1-carboxylic acid	Jadhav/Dorrestein	0.85
191.056	8.68	Quinic Acid	Ricardo M Borges	0.6
577.134	8.74	ReSpect:PT204590 Procyanidin B1|(-)-Epicatechin-(4-beta-8)-(+)-catechin|cis,trans''-4,8''-Bi-(3,3',4',5,7-pentahydroxyflavane)|(2R,3R,4R)-2-(3,4-dihydroxyphenyl)-4-[(2R,3S)-2-(3,4-dihydroxyphenyl)-3,5,7-trihydroxychro	Putative ReSpect Match	0.89
457.076	8.88	NCGC00164319-09![(2R,3R)-5,7-dihydroxy-2-(3,4,5-trihydroxyphenyl)-3,4-dihydro-2H-chromen-3-yl] 3,4,5-trihydroxybenzoate	Jadhav/Dorrestein	0.84
449.107	9.13	NCGC00384787-01!2-(3,4-dihydroxyphenyl)-5,7-dihydroxy-6-[3,4,5-trihydroxy-6-(hydroxymethyl)oxan-2-yl]-2,3-dihydrochromen-4-one	Jadhav/Dorrestein	0.7
465.102	9.15	NCGC00385598-01!(2R,3R)-2-(3,4-dihydroxyphenyl)-5,7-dihydroxy-3-[(2S,3R,4S,5S,6R)-3,4,5-trihydroxy-6-(hydroxymethyl)oxan-2-yl]oxy-2,3-dihydrochromen-4-one	Jadhav/Dorrestein	0.82
593.151	9.27	Vicenin-2	Norberto Lopes	0.85
635.088	9.45	NCGC00179867-02![(2R,3R,4S,5R,6S)-3,5-dihydroxy-4,6-bis[(3,4,5-trihydroxybenzoyl)oxy]oxan-2-yl]methyl 3,4,5-trihydroxybenzoate	Jadhav/Dorrestein	0.65
771.198	9.46	NCGC00380464-01!3-[(2S,3R,4S,5R,6S)-3,4-dihydroxy-6-methyl-5-[(2S,3R,4S,5S,6R)-3,4,5-trihydroxy-6-(hydroxymethyl)oxan-2-yl]oxyoxan-2-yl]oxy-2-(3,4-dihydroxyphenyl)-5-hydroxy-7-[3,4,5-trihydroxy-6-(hydroxymethyl)oxan-2-yl]oxychromen-4-one	Jadhav/Dorrestein	0.59
457.077	9.47	NCGC00164319-09![(2R,3R)-5,7-dihydroxy-2-(3,4,5-trihydroxyphenyl)-3,4-dihydro-2H-chromen-3-yl] 3,4,5-trihydroxybenzoate	Jadhav/Dorrestein	0.84
441.081	9.68	NCGC00385833-01![(2S,3R)-2-(3,4-dihydroxyphenyl)-3,5-dihydroxy-3,4-dihydro-2H-chromen-7-yl] 3,4,5-trihydroxybenzoate	Jadhav/Dorrestein	0.68
577.134	9.72	ReSpect:PT204590 Procyanidin B1|(-)-Epicatechin-(4-beta-8)-(+)-catechin|cis,trans''-4,8''-Bi-(3,3',4',5,7-pentahydroxyflavane)|(2R,3R,4R)-2-(3,4-dihydroxyphenyl)-4-[(2R,3S)-2-(3,4-dihydroxyphenyl)-3,5,7-trihydroxychro	Putative ReSpect Match	0.88
465.103	9.76	NCGC00385598-01!(2R,3R)-2-(3,4-dihydroxyphenyl)-5,7-dihydroxy-3-[(2S,3R,4S,5S,6R)-3,4,5-trihydroxy-6-(hydroxymethyl)oxan-2-yl]oxy-2,3-dihydrochromen-4-one	Jadhav/Dorrestein	0.58
563.14	9.88	NCGC00169650-03!5,7-dihydroxy-2-(4-hydroxyphenyl)-8-[3,4,5-trihydroxy-6-(hydroxymethyl)oxan-2-yl]-6-(3,4,5-trihydroxyoxan-2-yl)chromen-4-one	Jadhav/Dorrestein	0.76
479.082	9.9	ReSpect:PT209280 Myricetin-3-Galactoside|Myrc-3-Gal|Myricetin-3-Galactopyranoside	Putative ReSpect Match	0.94
191.056	9.9	Quinic Acid	Ricardo M Borges	0.61
447.092	10.02	ReSpect:PT204250 Homoorientin|Lutl-6-C-Glc|Isoorientin|luteolin-6-C-glucoside|luteolin- 6-C-beta-D-glucopyranoside|2-(3,4-dihydroxyphenyl)-5,7-dihydroxy-6-[(2S,3R,4R,5S,6R)-3,4,5-trihydroxy-6-(hydroxymethyl)oxan-2-yl]	Putative ReSpect Match	0.91
635.087	10.03	NCGC00179867-02![(2R,3R,4S,5R,6S)-3,5-dihydroxy-4,6-bis[(3,4,5-trihydroxybenzoyl)oxy]oxan-2-yl]methyl 3,4,5-trihydroxybenzoate	Jadhav/Dorrestein	0.71
635.088	10.26	NCGC00385134-01![(2R,3R,4S,5R,6S)-3-hydroxy-2-(hydroxymethyl)-5,6-bis[(3,4,5-trihydroxybenzoyl)oxy]oxan-4-yl] 3,4,5-trihydroxybenzoate	Jadhav/Dorrestein	0.8
563.14	10.26	NCGC00169650-03!5,7-dihydroxy-2-(4-hydroxyphenyl)-8-[3,4,5-trihydroxy-6-(hydroxymethyl)oxan-2-yl]-6-(3,4,5-trihydroxyoxan-2-yl)chromen-4-one	Jadhav/Dorrestein	0.76
615.098	10.28	NCGC00385510-01![(2S,3R,4S,5R,6R)-2-[2-(3,4-dihydroxyphenyl)-5,7-dihydroxy-4-oxochromen-3-yl]oxy-4,5-dihydroxy-6-(hydroxymethyl)oxan-3-yl] 3,4,5-trihydroxybenzoate	Jadhav/Dorrestein	0.55
577.134	10.34	ReSpect:PT204590 Procyanidin B1|(-)-Epicatechin-(4-beta-8)-(+)-catechin|cis,trans''-4,8''-Bi-(3,3',4',5,7-pentahydroxyflavane)|(2R,3R,4R)-2-(3,4-dihydroxyphenyl)-4-[(2R,3S)-2-(3,4-dihydroxyphenyl)-3,5,7-trihydroxychro	Putative ReSpect Match	0.74
609.146	10.45	Rutin	Norberto Lopes	0.94
449.071	10.55	ReSpect:PT209300 Myricetin-3-Xyloside|Myrc-3-Xyl	Putative ReSpect Match	0.92
751.117	10.65	NCGC00380510-01![6-[5,7-dihydroxy-2-(4-hydroxyphenyl)-4-oxochromen-3-yl]oxy-3,4-dihydroxy-5-(3,4,5-trihydroxybenzoyl)oxyoxan-2-yl]methyl 3,4,5-trihydroxybenzoate	Jadhav/Dorrestein	0.74
433.113	10.65	NCGC00380476-01!5,7-dihydroxy-2-(4-hydroxyphenyl)-6-[3,4,5-trihydroxy-6-(hydroxymethyl)oxan-2-yl]-2,3-dihydrochromen-4-one	Jadhav/Dorrestein	0.68
739.209	10.76	NCGC00169848-02!3-[4,5-dihydroxy-3-(3,4,5-trihydroxy-6-methyloxan-2-yl)oxy-6-[(3,4,5-trihydroxy-6-methyloxan-2-yl)oxymethyl]oxan-2-yl]oxy-5,7-dihydroxy-2-(4-hydroxyphenyl)chromen-4-one	Jadhav/Dorrestein	0.91
787.099	10.77	NCGC00385650-01![(2R,3R,4R,5R,6S)-5-hydroxy-3,4,6-tris[(3,4,5-trihydroxybenzoyl)oxy]oxan-2-yl]methyl 3,4,5-trihydroxybenzoate	Jadhav/Dorrestein	0.53
203.082	10.77	Spectral Match to L-Tryptophan from NIST14	Data from Kevin Bush	0.91
245.093	10.78	N-ACETYL-D-TRYPTOPHAN	Alexandrov Theodore	0.87
563.141	10.89	NCGC00169650-03!5,7-dihydroxy-2-(4-hydroxyphenyl)-8-[3,4,5-trihydroxy-6-(hydroxymethyl)oxan-2-yl]-6-(3,4,5-trihydroxyoxan-2-yl)chromen-4-one	Jadhav/Dorrestein	0.75
465.094	11.01	NCGC00385598-01!(2R,3R)-2-(3,4-dihydroxyphenyl)-5,7-dihydroxy-3-[(2S,3R,4S,5S,6R)-3,4,5-trihydroxy-6-(hydroxymethyl)oxan-2-yl]oxy-2,3-dihydrochromen-4-one	Jadhav/Dorrestein	0.51
465.094	11.01	NCGC00385598-01!(2R,3R)-2-(3,4-dihydroxyphenyl)-5,7-dihydroxy-3-[(2S,3R,4S,5S,6R)-3,4,5-trihydroxy-6-(hydroxymethyl)oxan-2-yl]oxy-2,3-dihydrochromen-4-one	Jadhav/Dorrestein	0.79
609.145	11.02	Rutin	Norberto Lopes	0.95
787.093	11.04	NCGC00385650-01![(2R,3R,4R,5R,6S)-5-hydroxy-3,4,6-tris[(3,4,5-trihydroxybenzoyl)oxy]oxan-2-yl]methyl 3,4,5-trihydroxybenzoate	Jadhav/Dorrestein	0.54
463.087	11.06	ReSpect:PT209290 Myricetin-3-Rhamnoside|Myrc-3-Rha|Myricitrin|Myricitrine|Myricetrin|Myricitroside|myricetin-3-O-rhamnoside|Myricetol 3-rhamnoside|Myricetin 3-O-alpha-L-rhamnopyranoside|3-((6-Deoxy-alpha-L-mannopyrano	Putative ReSpect Match	0.92
769.218	11.2	NCGC00179887-02!3-[(2S,3R,4S,5R,6R)-6-[[(2R,3R,4R,5S,6S)-3,5-dihydroxy-6-methyl-4-[(2S,3R,4R,5R,6S)-3,4,5-trihydroxy-6-methyloxan-2-yl]oxyoxan-2-yl]oxymethyl]-3,4,5-trihydroxyoxan-2-yl]oxy-2-(3,4-dihydroxyphenyl)-5-hydroxy-7-methoxychromen-4-one	Jadhav/Dorrestein	0.88
431.097	11.22	Isovitexin	Norberto Lopes	0.86
301.034	11.24	MoNA:2981515 Quer	MoNA	0.83
577.134	11.3	ReSpect:PT204590 Procyanidin B1|(-)-Epicatechin-(4-beta-8)-(+)-catechin|cis,trans''-4,8''-Bi-(3,3',4',5,7-pentahydroxyflavane)|(2R,3R,4R)-2-(3,4-dihydroxyphenyl)-4-[(2R,3S)-2-(3,4-dihydroxyphenyl)-3,5,7-trihydroxychro	Putative ReSpect Match	0.88
599.104	11.32	NCGC00384776-01![6-[5,7-dihydroxy-2-(4-hydroxyphenyl)-4-oxochromen-3-yl]oxy-3,4,5-trihydroxyoxan-2-yl]methyl 3,4,5-trihydroxybenzoate	Jadhav/Dorrestein	0.82
593.151	11.48	NCGC00180770-02!3-[(2S,3R,4S,5R,6R)-3,5-dihydroxy-6-(hydroxymethyl)-4-[(2S,3R,4R,5R,6S)-3,4,5-trihydroxy-6-methyloxan-2-yl]oxyoxan-2-yl]oxy-5,7-dihydroxy-2-(4-hydroxyphenyl)chromen-4-one	Jadhav/Dorrestein	0.88
433.114	11.49	Spectral Match to Aloenin from NIST14	Data from Christopher A. Lowry	0.64
449.108	11.49	NCGC00168909-02!(2R,3R)-2-(3,4-dihydroxyphenyl)-5,7-dihydroxy-3-[(2S,3R,4R,5R,6S)-3,4,5-trihydroxy-6-methyloxan-2-yl]oxy-2,3-dihydrochromen-4-one	Jadhav/Dorrestein	0.7
305.063	11.52	Epigallocatechin	Norberto Lopes	0.66
579.134	11.63	quercetin-3-O-deoxyhexosyl(1-2)pentoside	NPLopes	0.9
623.161	11.65	ReSpect:PT209110 Isorhamnetin-3-Galactoside-6''-Rhamnoside|Isor-3-Gal-6''-Rha	Putative ReSpect Match	0.93
463.087	11.87	Spectral Match to Isoquercitin from NIST14	Data from Sambles	0.79
433.076	11.92	Avicularin	Norberto Lopes	0.92
299.056	12.09	MoNA:2899716 4',5,7-Trihydroxy-3'-methoxy-flavone	MoNA	0.59
593.151	12.11	NCGC00180770-02!3-[(2S,3R,4S,5R,6R)-3,5-dihydroxy-6-(hydroxymethyl)-4-[(2S,3R,4R,5R,6S)-3,4,5-trihydroxy-6-methyloxan-2-yl]oxyoxan-2-yl]oxy-5,7-dihydroxy-2-(4-hydroxyphenyl)chromen-4-one	Jadhav/Dorrestein	0.91
623.161	12.35	ReSpect:PT209140 Isorhamnetin-3-Glucoside-4'-Glucoside|Isor-3-Glc-4'-Glc|Isorhamnetin 3,4'-diglucoside|Dactylin|Dactilin	Putative ReSpect Match	0.97
447.092	12.42	ReSpect:PT204350 Quercitrin|Quer-3-Rha|Quercitrin|thujin|Quercetrin|Quercimelin|Quercitroside|quercetin-3-O-rhamnoside|Quercetin- 3-(6-deoxy-alpha-L-mannopyranoside)|3,3',4',5,7-Pentahydroxyflavone-3-L-rhamnoside|2-(3	Putative ReSpect Match	0.9
449.102	12.46	NCGC00168909-02!(2R,3R)-2-(3,4-dihydroxyphenyl)-5,7-dihydroxy-3-[(2S,3R,4R,5R,6S)-3,4,5-trihydroxy-6-methyloxan-2-yl]oxy-2,3-dihydrochromen-4-one	Jadhav/Dorrestein	0.7
463.087	12.59	methoxy-myricetin-3-O-pentoside	NPLopes	0.81
477.103	12.6	methoxy-quercetin-3-O-hexoside	NPLopes	0.91
305.065	12.91	Epigallocatechin	Norberto Lopes	0.94
417.081	12.95	ReSpect:PT209220 Kaempferol-3-O-alpha-L-arabinoside|Kaem-3-Ara|Kaempferol-3-O-alpha-L-arabinopyranoside|5,7-dihydroxy-2-(4-hydroxyphenyl)-3-[(2S,3R,4S,5S)-3,4,5-trihydroxyoxan-2-yl]oxychromen-4-one	Putative ReSpect Match	0.94
497.165	12.96	NCGC00380505-01_C23H30O12_3,4-Dihydroxy-5-[(6-O-{[4-(2-hydroxy-2-propanyl)-1-cyclohexen-1-yl]carbonyl}-beta-D-glucopyranosyl)oxy]benzoic acid	Jadhav/Dorrestein	0.9
593.15	13.03	methoxy-quercetin-7-O-deoxyhexosyl-pentoside	NPLopes	0.66
301.034	13.13	ReSpect:PT204090 Quercetin|Quer|3,3',4',5,7-pentahydroxyflavone|Flavin meletin|Kvercetin|Meletin|Quercetol|Quercetine|Quertine|Quercitin|Sophoretin|Xanthaurine|3',4',5,7-Tetrahydroxyflavan-3-ol|2-(3,4-Dihydroxyphenyl)	Putative ReSpect Match	0.53
463.087	13.3	Spectral Match to Isoquercitin from NIST14	Data from Sambles	0.65
615.098	13.42	NCGC00385142-01![(2S,3R,4R,5R,6S)-2-[5,7-dihydroxy-4-oxo-2-(3,4,5-trihydroxyphenyl)chromen-3-yl]oxy-4,5-dihydroxy-6-methyloxan-3-yl] 3,4,5-trihydroxybenzoate	Jadhav/Dorrestein	0.87
447.092	13.5	kaempferol-7-O-hexoside	NPLopes	0.9
435.128	13.5	Spectral Match to Naringenin-7-O-glucoside from NIST14	Data from Pieter Dorrestein	0.58
431.097	13.69	ReSpect:PT209260 Kaempferol-3-Rhamnoside|Kaem-3-Rha|Afzelin|5,7-dihydroxy-2-(4-hydroxyphenyl)-3-[(2S,3R,4R,5R,6S)-3,4,5-trihydroxy-6-methyloxan-2-yl]oxychromen-4-one	Putative ReSpect Match	0.95
461.108	14.03	NCGC00380690-01_C22H22O11_beta-D-Glucopyranose, 6-O-[(2E)-1-oxo-3-phenyl-2-propen-1-yl]-, 1-(3,4,5-trihydroxybenzoate)	Jadhav/Dorrestein	0.58
751.114	14.1	NCGC00380510-01![6-[5,7-dihydroxy-2-(4-hydroxyphenyl)-4-oxochromen-3-yl]oxy-3,4-dihydroxy-5-(3,4,5-trihydroxybenzoyl)oxyoxan-2-yl]methyl 3,4,5-trihydroxybenzoate	Jadhav/Dorrestein	0.71
587.141	14.56	NCGC00380582-01![(2R,3S,4S,5R,6S)-6-[3,5-dihydroxy-4-[3-(4-hydroxyphenyl)propanoyl]phenoxy]-3,4,5-trihydroxyoxan-2-yl]methyl 3,4,5-trihydroxybenzoate	Jadhav/Dorrestein	0.8
303.05	14.61	MoNA:2887213 2-(3,4-dihydroxyphenyl)-3,5,7-trihydroxychroman-4-one	MoNA	0.76
599.103	14.84	NCGC00169759-02![(2S,3R,4R,5S,6S)-2-[2-(3,4-dihydroxyphenyl)-5,7-dihydroxy-4-oxochromen-3-yl]oxy-3,5-dihydroxy-6-methyloxan-4-yl] 3,4,5-trihydroxybenzoate	Jadhav/Dorrestein	0.66
285.039	15.11	Luteolin	Norberto Lopes	0.89
301.034	15.26	ReSpect:PT204090 Quercetin|Quer|3,3',4',5,7-pentahydroxyflavone|Flavin meletin|Kvercetin|Meletin|Quercetol|Quercetine|Quertine|Quercitin|Sophoretin|Xanthaurine|3',4',5,7-Tetrahydroxyflavan-3-ol|2-(3,4-Dihydroxyphenyl)	Putative ReSpect Match	0.87
461.108	15.28	NCGC00380690-01_C22H22O11_beta-D-Glucopyranose, 6-O-[(2E)-1-oxo-3-phenyl-2-propen-1-yl]-, 1-(3,4,5-trihydroxybenzoate)	Jadhav/Dorrestein	0.72
289.071	15.53	MoNA:2871079 (+/-)-Catechin	MoNA	0.61
593.129	15.66	ReSpect:PT209253 Kaempferol-3-Glucoside-6''-p-coumaroyl|Kaem-3-Glc-6pp-p-Cou|Tiliroside|Tribuloside|kaempferol-3-O-(6-p-coumaroyl)-glucoside|Potengriffioside A|[(2R,3S,4S,5R,6S)-6-[5,7-dihydroxy-2-(4-hydroxyphenyl)-4-	Putative ReSpect Match	0.95
461.108	15.78	NCGC00380690-01_C22H22O11_beta-D-Glucopyranose, 6-O-[(2E)-1-oxo-3-phenyl-2-propen-1-yl]-, 1-(3,4,5-trihydroxybenzoate)	Jadhav/Dorrestein	0.73
625.119	15.98	myricetin-3-O-hexosyl(1-2)deoxyhexoside	NPLopes	0.69
289.071	16.51	MoNA:2871079 (+/-)-Catechin	MoNA	0.87
289.071	17.11	MoNA:2871079 (+/-)-Catechin	MoNA	0.76
285.04	17.18	Kaempferol	Norberto Lopes	0.64
987.534	17.19	NCGC00384682-01_C48H78O18_1-O-[(3beta)-3-{[3-O-(beta-D-Galactopyranosyl)-beta-D-glucopyranosyl]oxy}-28-oxoolean-12-en-28-yl]-beta-D-glucopyranose	Jadhav/Dorrestein	0.55
273.075	17.36	MoNA:2869278 Floretin	MoNA	0.84
329.066	17.49	5,7-dihydroxy-2-(4-hydroxyphenyl)-3,6-dimethoxy-4H-chromen-4-one	Norberto Lopes	0.82
299.056	17.5	MoNA:2899716 4',5,7-Trihydroxy-3'-methoxy-flavone	MoNA	0.77
593.129	18.39	quercetin-3-O-deoxyhexosyl(1-2)deoxyhexoside	NPLopes	0.79
674.428	18.77	NCGC00347780-02_C38H61NO9_3-[(2-Acetamido-2-deoxyhexopyranosyl)oxy]-16-hydroxyolean-12-en-28-oic acid	Jadhav/Dorrestein	0.75
987.515	21.29	NCGC00384682-01_C48H78O18_1-O-[(3beta)-3-{[3-O-(beta-D-Galactopyranosyl)-beta-D-glucopyranosyl]oxy}-28-oxoolean-12-en-28-yl]-beta-D-glucopyranose	Jadhav/Dorrestein	0.62
674.427	21.47	NCGC00347780-02_C38H61NO9_3-[(2-Acetamido-2-deoxyhexopyranosyl)oxy]-16-hydroxyolean-12-en-28-oic acid	Jadhav/Dorrestein	0.8
897.484	21.62	NCGC00385731-01_C46H74O17_(3beta,5xi,9xi,16alpha)-3-{[alpha-L-Arabinopyranosyl-(1->2)-alpha-L-arabinopyranosyl-(1->6)-beta-D-glucopyranosyl]oxy}-16-hydroxyolean-12-en-28-oic acid	Jadhav/Dorrestein	0.63
674.428	23.11	NCGC00347780-02_C38H61NO9_3-[(2-Acetamido-2-deoxyhexopyranosyl)oxy]-16-hydroxyolean-12-en-28-oic acid	Jadhav/Dorrestein	0.89
987.514	23.61	NCGC00380668-01_C48H78O18_(3beta,5xi,9xi,22beta)-22,24-Dihydroxyolean-12-en-3-yl 6-deoxy-alpha-L-mannopyranosyl-(1->2)-beta-D-galactopyranosyl-(1->2)-beta-D-glucopyranosiduronic acid	Jadhav/Dorrestein	0.67
559.312	28.79	NCGC00380867-01_C27H46O9_9,12,15-Octadecatrienoic acid, 3-(hexopyranosyloxy)-2-hydroxypropyl ester, (9Z,12Z,15Z)-	Jadhav/Dorrestein	0.88
452.278	30.15	Spectral Match to 1-Palmitoyl-2-hydroxy-sn-glycero-3-phosphoethanolamine from NIST14	Data from Kevin Bush	0.97
453.28	30.18	PE(16:0/0:0); [M-H]- C21H43N1O7P1	Thomas Metz	0.84
