# Supplementary material for: Tracking of Host Defenses and Phylogeny During the Radiation of Neotropical Inga-Feeding Sawflies (Hymenoptera; Argidae)
Source: Front Plant Sci. 2018 Aug 23;9:1237. doi: 10.3389/fpls.2018.01237 (PMC6116116; doi:10.3389/fpls.2018.01237)
Supplement: TABLE S2 — Metadata for all sawfly specimens collected in this study, including host plant and collection location, MOTU allocation (1.5% jMOTU taxa), and Genbank accession numbers for all sequenced gene fragments. Note that in our sampling system, each study site has independent collection numbers. Thus, it is possible for two Inga plants to have the same host plant number, but only because they were sampled at different sites. [file Table_2.XLSX]

## Sheet: Sheet1
sawfly collection number	no. individuals in group	Sawfly family Based on BLAST Match	Closest genus match on BOLD (if % match≥90%)	% match to closest BOLD accession	taxon MOTU	collection day	collection month	collection year	collection site	Country	host plant number	host plant species	COI accession number	wingless accession number	ITS2 accession number	PGD accession number
Th-1116	1	Tenthredinidae			MOTU_1	23	Aug	2014	Tiputini	Ecuador	1593	Inga 'morphotype T50'	yes		yes
Th-1241	2	Tenthredinidae			MOTU_1	30	Aug	2014	Tiputini	Ecuador	1731	Inga 'morphotype T50'	yes		yes
Th-1262	1	Tenthredinidae			MOTU_1	2	Sep	2014	Tiputini	Ecuador	1782	Inga 'morphotype T50'	yes		yes	yes
Th-059	6	Tenthredinidae			MOTU_2	6	Jul	2013	Tiputini	Ecuador	63	Inga nobilis	yes		yes	yes
Th-1036	2	Argidae			MOTU_3	20	Aug	2014	Tiputini	Ecuador	1505	Quararibea sp.	yes		yes
Th-787	5	Argidae			MOTU_4	4	Aug	2014	Tiputini	Ecuador	1180	Inga bourgonii	yes	yes	yes	yes
Nh-1072	1	Argidae			MOTU_5	24	Jul	2012	Nouragues	French Guiana	10714	Inga bourgonii	yes	yes	yes	yes
Nh-1090	4	Argidae			MOTU_5	26	Jul	2012	Nouragues	French Guiana	10738	Inga bourgonii	yes
Nh-1240	1	Argidae			MOTU_5	2	Aug	2012	Nouragues	French Guiana	10903	Inga retinocarpa	yes	yes	yes
Nh-1299	15	Argidae			MOTU_5	4	Aug	2012	Nouragues	French Guiana	10957	Inga bourgonii	yes
Nh-149	6	Argidae			MOTU_5	7	Jul	2011	Nouragues	French Guiana	308	Inga bourgonii	yes
Nh-290	12	Argidae			MOTU_5	18	Jul	2011	Nouragues	French Guiana	652	Inga bourgonii	yes
Nh-293	2	Argidae			MOTU_5	18	Jul	2011	Nouragues	French Guiana	655	Inga bourgonii	yes	yes	yes	yes
Nh-1010	32	Argidae			MOTU_6	21	Jul	2012	Nouragues	French Guiana	10649	Inga paraensis	yes	yes	yes	yes
Nh-897	12	Argidae			MOTU_6	15	Jul	2012	Nouragues	French Guiana	10540	Inga paraensis	yes	yes	yes	yes
Nh-1570	4	Argidae			MOTU_7	16	Aug	2012	Nouragues	French Guiana	11286	Inga marginata	yes	yes	yes	yes
BCI-h715	7	Argidae			MOTU_8	23	Jan	2012	Barro Colorado Island	Panama	10221	Inga umbellifera	yes
BCI-h720	10	Argidae			MOTU_8	23	Jan	2012	Barro Colorado Island	Panama	10225	Inga umbellifera	yes
BCI-h722	47	Argidae			MOTU_8	23	Jan	2012	Barro Colorado Island	Panama	10226	Inga umbellifera	yes	yes	yes	yes
BCI-h723	35	Argidae			MOTU_8	23	Jan	2012	Barro Colorado Island	Panama	10226	Inga umbellifera	yes
BCI-h737	68	Argidae			MOTU_8	23	Jan	2012	Barro Colorado Island	Panama	10237	Inga umbellifera	yes
BCI-h747	10	Argidae			MOTU_8	24	Jan	2012	Barro Colorado Island	Panama	9148	Inga umbellifera	yes	yes	yes	yes
BCI-h748	35	Argidae			MOTU_8	24	Jan	2012	Barro Colorado Island	Panama	9177	Inga umbellifera	yes
BCI-h761	10	Argidae			MOTU_8	26	Jan	2012	Barro Colorado Island	Panama	10263	Inga umbellifera	yes
BCI-h837	5	Argidae			MOTU_8	1	Feb	2012	Barro Colorado Island	Panama	10318	Inga umbellifera	yes
Nh-1158	4	Argidae			MOTU_9	28	Jul	2012	Nouragues	French Guiana	10809	Inga jenmani	yes	yes	yes	yes
Nh-1700	5	Argidae	Ptenos	90	MOTU_10	20	Aug	2012	Nouragues	French Guiana	11430	Inga obidensis	yes	yes	yes	yes
Nh-355	3	Argidae			MOTU_11	22	Jul	2011	Nouragues	French Guiana	741	Inga auristellae	yes	yes	yes	yes
Nh-166	2	Argidae			MOTU_12	8	Jul	2011	Nouragues	French Guiana	337	Inga laurina	yes	yes	yes	yes
Nh-238	9	Argidae			MOTU_12	15	Jul	2011	Nouragues	French Guiana	587	Inga obidensis	yes
Nh-243	1	Argidae			MOTU_12	15	Jul	2011	Nouragues	French Guiana	597	Inga obidensis	yes
Nh-405	9	Argidae			MOTU_12	25	Jul	2011	Nouragues	French Guiana	829	Inga obidensis	yes	yes	yes	yes
Nh-921	1	Argidae			MOTU_12	17	Jul	2012	Nouragues	French Guiana	10560	Inga laurina	yes	yes	yes	yes
Th-365	6	Argidae			MOTU_13	27	Jul	2013	Tiputini	Ecuador	546	Inga umbratica	yes	yes	yes	yes
Th-950	8	Argidae			MOTU_13	15	Aug	2014	Tiputini	Ecuador	172	Inga laurina	yes	yes	yes	yes
Th-951	2	Argidae			MOTU_13	15	Aug	2014	Tiputini	Ecuador	172	Inga laurina	yes
Nh-1233	5	Argidae			MOTU_14	2	Aug	2012	Nouragues	French Guiana	10897	Inga capitata 'subsp.12'	yes	yes	yes	yes
Nh-1412	6	Argidae			MOTU_14	8	Aug	2012	Nouragues	French Guiana	11091	Inga capitata 'subsp.12'	yes
Nh-1540	5	Argidae			MOTU_14	15	Aug	2012	Nouragues	French Guiana	11250	Inga capitata 'subsp.12'	yes
Nh-1659	11	Argidae			MOTU_14	19	Aug	2012	Nouragues	French Guiana	11383	Inga capitata 'subsp.12'	yes
Nh-1842	8	Argidae			MOTU_14	23	Aug	2012	Nouragues	French Guiana	11590	Inga capitata 'subsp.12'	yes
Nh-416	9	Argidae			MOTU_14	26	Jul	2011	Nouragues	French Guiana	770	Inga capitata 'subsp.35'	yes	yes	yes	yes
Th-053	6	Argidae	Ptenos	90	MOTU_15	6	Jul	2013	Tiputini	Ecuador	59	Inga alata	yes	yes	yes	yes
Th-1332	3	Argidae	Ptenos	90	MOTU_15	6	Sep	2014	Tiputini	Ecuador	1863	Inga 'morphotype T82'	yes	yes	yes	yes
Th-1495	5	Argidae			MOTU_16	16	Sep	2014	Tiputini	Ecuador	2044	Inga edulis	yes	yes	yes	yes
BCI-h745	25	Argidae	Ptenos leucopoda	99	MOTU_17	24	Jan	2012	Barro Colorado Island	Panama	9144	Inga goldmanii	yes	yes	yes	yes
BCI-h781	42	Argidae	Ptenos leucopoda	99	MOTU_17	27	Jan	2012	Barro Colorado Island	Panama	10280	Inga cocleensis	yes	yes	yes	yes
Nh-391	7	Argidae	Ptenos	92	MOTU_18	24	Jul	2011	Nouragues	French Guiana	802	Inga thibaudiana	yes	yes	yes	yes
Nh-1168	1	Argidae	Ptenos	93	MOTU_19	30	Jul	2012	Nouragues	French Guiana	10826	Inga leiocalycina	yes
Nh-1173	2	Argidae	Ptenos	93	MOTU_19	30	Jul	2012	Nouragues	French Guiana	10826	Inga leiocalycina	yes
Nh-139	10	Argidae	Ptenos	93	MOTU_19	7	Jul	2011	Nouragues	French Guiana	307	Inga leiocalycina	yes
Nh-144	7	Argidae	Ptenos	93	MOTU_19	7	Jul	2011	Nouragues	French Guiana	306	Inga leiocalycina	yes
Nh-1456	2	Argidae	Ptenos	93	MOTU_19	12	Aug	2012	Nouragues	French Guiana	11186	Inga leiocalycina	yes	yes	yes	yes
Nh-311	6	Argidae	Ptenos	93	MOTU_19	19	Jul	2011	Nouragues	French Guiana	602	Inga leiocalycina	yes	yes	yes	yes
Th-1144	2	Argidae			MOTU_20	25	Aug	2014	Tiputini	Ecuador	1627	Inga leiocalycina	yes
Th-1322	2	Argidae			MOTU_20	6	Sep	2014	Tiputini	Ecuador	1850	Inga leiocalycina	yes	yes	yes	yes
Th-1326	1	Argidae			MOTU_20	6	Sep	2014	Tiputini	Ecuador	1857	Inga leiocalycina	yes
Th-1331	2	Argidae			MOTU_20	6	Sep	2014	Tiputini	Ecuador	1863	Inga leiocalycina	yes
Th-824	3	Argidae			MOTU_20	8	Aug	2014	Tiputini	Ecuador	1239	Inga leiocalycina	yes	yes	yes	yes
Nh-1035	5	Argidae	Ptenos	92	MOTU_21	23	Jul	2012	Nouragues	French Guiana	10673	Inga longipedunculata	yes	yes	yes	yes
Nh-1088	5	Argidae	Ptenos	92	MOTU_21	26	Jul	2012	Nouragues	French Guiana	10740	Inga longipedunculata	yes	yes	yes	yes
Nh-1043	2	Argidae	Ptenos	92	MOTU_22	23	Jul	2012	Nouragues	French Guiana	10684	Inga poeppigiana	yes
Nh-1438	1	Argidae	Ptenos	92	MOTU_22	9	Aug	2012	Nouragues	French Guiana	11118	Inga poeppigiana	yes
Nh-436	6	Argidae	Ptenos	92	MOTU_22	27	Jul	2011	Nouragues	French Guiana	880	Inga poeppigiana	yes	yes	yes	yes
Nh-956	2	Argidae	Ptenos	92	MOTU_22	18	Jul	2012	Nouragues	French Guiana	10597	Inga poeppigiana	yes	yes	yes	yes
Nh-1102	2	Argidae			MOTU_23	26	Jul	2012	Nouragues	French Guiana	10747	Inga marginata	yes	yes	yes	yes
Nh-1706	1	Argidae			MOTU_23	20	Aug	2012	Nouragues	French Guiana	11436	Inga stipularis	yes
Nh-485	1	Argidae			MOTU_23	31	Jul	2011	Nouragues	French Guiana	976	Inga stipularis	yes	yes	yes	yes
BCI-h650	7	Argidae			MOTU_24	19	Jan	2012	Barro Colorado Island	Panama	10160	Inga laurina	yes	yes	yes	yes
LA2010-49-1	1	Argidae			MOTU_25	31	Jul	2010	Los Amigos	Peru		Inga marginata	yes	yes	yes	yes
LA2010-49-2	1	Argidae			MOTU_25	31	Jul	2010	Los Amigos	Peru		Inga marginata	yes	yes	yes	yes
Th-1007	14	Argidae			MOTU_26	18	Aug	2014	Tiputini	Ecuador	1470	Inga brachyrhachis	yes
Th-1169	12	Argidae			MOTU_26	26	Aug	2014	Tiputini	Ecuador	1644	Inga capitata 'subsp.33'	yes
Th-1184	30	Argidae			MOTU_26	27	Aug	2014	Tiputini	Ecuador	1664	Inga brachyrhachis	yes	yes	yes	yes
Th-1216	20	Argidae			MOTU_26	28	Aug	2014	Tiputini	Ecuador	1265	Inga capitata 'subsp.33'	yes
Th-1358	10	Argidae			MOTU_26	8	Sep	2014	Tiputini	Ecuador	1889	Inga capitata 'subsp.33'	yes
Th-1441	22	Argidae			MOTU_26	13	Sep	2014	Tiputini	Ecuador	2002	Inga brachyrhachis	yes
Th-1448	11	Argidae			MOTU_26	13	Sep	2014	Tiputini	Ecuador	2015	Inga brachyrhachis	yes
Th-1501	10	Argidae			MOTU_26	16	Sep	2014	Tiputini	Ecuador	1156	Inga capitata 'subsp.33'	yes
Th-196	11	Argidae			MOTU_26	19	Jul	2013	Tiputini	Ecuador	353	Inga brachyrhachis	yes	yes	yes	yes
Th-372	13	Argidae			MOTU_26	27	Jul	2013	Tiputini	Ecuador	551	Inga capitata 'subsp.33'	yes	yes	yes	yes
Th-581	9	Argidae			MOTU_26	9	Aug	2013	Tiputini	Ecuador	806	Inga capitata 'subsp.33'	yes
Th-680	15	Argidae			MOTU_26	19	Aug	2013	Tiputini	Ecuador	598	Inga capitata 'subsp.33'	yes
Th-742	5	Argidae			MOTU_26	28	Jul	2014	Tiputini	Ecuador	1021	Inga brachyrhachis	yes
Th-758	26	Argidae			MOTU_26	1	Aug	2014	Tiputini	Ecuador	1020	Inga brachyrhachis	yes
Th-759	32	Argidae			MOTU_26	1	Aug	2014	Tiputini	Ecuador	1021	Inga brachyrhachis	yes
Th-812	3	Argidae			MOTU_26	7	Aug	2014	Tiputini	Ecuador	1020	Inga brachyrhachis	yes
Th-865	43	Argidae			MOTU_26	11	Aug	2014	Tiputini	Ecuador	1287	Inga brachyrhachis	yes
Th-908	4	Argidae			MOTU_26	13	Aug	2014	Tiputini	Ecuador	1335	Inga brachyrhachis	yes
Th-995	24	Argidae			MOTU_26	16	Aug	2014	Tiputini	Ecuador	89	Inga capitata 'subsp.33'	yes
Th-257	16	Argidae			MOTU_27	23	Jul	2013	Tiputini	Ecuador	429	Inga 'morphotype T19'	yes	yes	yes	yes
Th-499	6	Argidae			MOTU_27	2	Aug	2013	Tiputini	Ecuador	686	Inga 'morphotype T19'	yes	yes	yes	yes
Th-1173	1	Argidae			MOTU_28	26	Aug	2014	Tiputini	Ecuador	1649	Zygia swartziana	yes	yes	yes	yes
Th-1509	7	Argidae			MOTU_29	21	Sep	2014	Tiputini	Ecuador	2072	Inga sertulifera	yes	yes	yes	yes
Th-991	2	Argidae			MOTU_29	16	Aug	2014	Tiputini	Ecuador	1434	Inga sertulifera	yes	yes	yes	yes
Nh-1101	5	Argidae			MOTU_30	26	Jul	2012	Nouragues	French Guiana	10741	Inga 'morphotype umbelliferaNoY'	yes	yes	yes	yes
Nh-1331	6	Argidae			MOTU_30	6	Aug	2012	Nouragues	French Guiana	10992	Inga 'morphotype umbelliferaNoY'	yes	yes	yes	yes
Nh-1559	8	Argidae			MOTU_30	15	Aug	2012	Nouragues	French Guiana	11269	Inga 'morphotype umbelliferaNoY'	yes	yes	yes	yes
Nh-1221	7	Argidae			MOTU_31	2	Aug	2012	Nouragues	French Guiana	10883	Inga alba	yes	yes	yes	yes
LA2010-508-1	4	Argidae			MOTU_32	25	Oct	2010	Los Amigos	Peru		Inga alba	yes
LA2010-508-2	1	Argidae			MOTU_32	25	Oct	2010	Los Amigos	Peru		Inga alba	yes
LA2010-570-2	5	Argidae			MOTU_32	4	Dec	2010	Los Amigos	Peru		Inga alba	yes
LA2010-570-3	1	Argidae			MOTU_32	4	Dec	2010	Los Amigos	Peru		Inga alba	yes	yes	yes	yes
LA2011-536	1	Argidae			MOTU_32	23	Sep	2011	Los Amigos	Peru		Inga alba	yes	yes	yes	yes
LA2011-667	1	Argidae			MOTU_32	28	Sep	2011	Los Amigos	Peru		Inga alba	yes
LA2011-668	1	Argidae			MOTU_32	28	Sep	2011	Los Amigos	Peru		Inga alba	yes
LA2011-890	1	Argidae			MOTU_32	17	Oct	2011	Los Amigos	Peru		Inga alba	yes
LA2011-891	1	Argidae			MOTU_32	17	Oct	2011	Los Amigos	Peru		Inga alba	yes
Nh-1002	13	Argidae			MOTU_33	21	Jul	2012	Nouragues	French Guiana	10643	Inga cylindrica	yes	yes	yes	yes
Nh-1081	2	Argidae			MOTU_33	26	Jul	2012	Nouragues	French Guiana	10723	Inga cylindrica	yes
Nh-117	4	Argidae			MOTU_33	4	Jul	2011	Nouragues	French Guiana	242	Inga cylindrica	yes	yes	yes	yes
Nh-1883	1	Argidae			MOTU_33	25	Aug	2012	Nouragues	French Guiana	11626	Inga cylindrica	yes
LA2010-368	1	Argidae			MOTU_34	2	Oct	2010	Los Amigos	Peru		Inga laurina	yes	yes	yes	yes
LA2010-74	1	Argidae			MOTU_34	9	Aug	2010	Los Amigos	Peru		Inga 'morphotype brachystachys.cf'	yes	yes	yes	yes
Th-1125	10	Argidae			MOTU_35	25	Aug	2014	Tiputini	Ecuador	1614	Inga 'morphotype T29'	yes
Th-1220	4	Argidae			MOTU_35	29	Aug	2014	Tiputini	Ecuador	1614	Inga 'morphotype T29'	yes
Th-1281	6	Argidae			MOTU_35	2	Sep	2014	Tiputini	Ecuador	1798	Inga 'morphotype T29'	yes	yes	yes	yes
Th-1282	3	Argidae			MOTU_35	2	Sep	2014	Tiputini	Ecuador	1804	Inga 'morphotype T29'	yes
Th-259	6	Argidae			MOTU_35	23	Jul	2013	Tiputini	Ecuador	432	Inga 'morphotype T29'	yes
Th-490	1	Argidae			MOTU_35	2	Aug	2013	Tiputini	Ecuador	682	Inga 'morphotype T29'	yes
Th-492	15	Argidae			MOTU_35	2	Aug	2013	Tiputini	Ecuador	682	Inga 'morphotype T29'	yes	yes	yes	yes
Th-529	1	Argidae			MOTU_35	5	Aug	2013	Tiputini	Ecuador	741	Inga 'morphotype T29'	yes
Th-612	39	Argidae			MOTU_35	13	Aug	2013	Tiputini	Ecuador	848	Inga 'morphotype T29'	yes
Th-662	19	Argidae			MOTU_35	17	Aug	2013	Tiputini	Ecuador	819	Inga 'morphotype T29'	yes
Th-663	12	Argidae			MOTU_35	17	Aug	2013	Tiputini	Ecuador	819	Inga 'morphotype T29'	yes
Th-705	2	Argidae			MOTU_35	21	Aug	2013	Tiputini	Ecuador	975	Inga 'morphotype T29'	yes	yes	yes	yes
Th-821	12	Argidae			MOTU_35	7	Aug	2014	Tiputini	Ecuador	1167	Inga 'morphotype T29'	yes
Th-822	1	Argidae			MOTU_35	7	Aug	2014	Tiputini	Ecuador	1167	Inga 'morphotype T29'	yes
Th-855	12	Argidae			MOTU_35	10	Aug	2014	Tiputini	Ecuador	1278	Inga 'morphotype T29'	yes
Th-877	1	Argidae			MOTU_35	12	Aug	2014	Tiputini	Ecuador	1098	Inga 'morphotype T29'	yes
Th-927	12	Argidae			MOTU_35	14	Aug	2014	Tiputini	Ecuador	1359	Inga 'morphotype T29'	yes
Th-998	30	Argidae			MOTU_35	17	Aug	2014	Tiputini	Ecuador	1447	Inga 'morphotype T29'	yes
Th-875	1	Argidae			MOTU_36	12	Aug	2014	Tiputini	Ecuador	1401	Inga ruiziana	yes	yes	yes	yes
Th-1383	5	Argidae			MOTU_37	10	Sep	2014	Tiputini	Ecuador	1905	Inga umbratica	yes
Th-218	2	Argidae			MOTU_37	20	Jul	2013	Tiputini	Ecuador	386	Inga auristellae	yes	yes	yes	yes
Th-356	4	Argidae			MOTU_37	26	Jul	2013	Tiputini	Ecuador	536	Inga auristellae	yes
Th-535	2	Argidae			MOTU_37	5	Aug	2013	Tiputini	Ecuador	751	Inga umbratica	yes
Th-536	1	Argidae			MOTU_37	5	Aug	2013	Tiputini	Ecuador	751	Inga umbratica	yes	yes	yes	yes
LA2010-229-2	6	Argidae			MOTU_38	5	Sep	2010	Los Amigos	Peru		Inga capitata 'subsp.33'	yes
LA2010-229-5	1	Argidae			MOTU_38	5	Sep	2010	Los Amigos	Peru		Inga capitata 'subsp.33'	yes	yes	yes	yes
LA2010-492-1	10	Argidae			MOTU_38	23	Oct	2010	Los Amigos	Peru		Inga capitata 'subsp.35'	yes	yes	yes	yes
LA2010-492-2	1	Argidae			MOTU_38	23	Oct	2010	Los Amigos	Peru		Inga capitata 'subsp.35'	yes
LA2011-234	1	Argidae			MOTU_38	15	Sep	2011	Los Amigos	Peru		Inga capitata 'subsp.33'	yes
LA2011-235	1	Argidae			MOTU_38	15	Sep	2011	Los Amigos	Peru		Inga capitata 'subsp.33'	yes
LA2011-239	1	Argidae			MOTU_38	15	Sep	2011	Los Amigos	Peru		Inga capitata 'subsp.33'	yes
LA2011-240	1	Argidae			MOTU_38	15	Sep	2011	Los Amigos	Peru		Inga capitata 'subsp.33'	yes
LA2011-578	1	Argidae			MOTU_38	24	Sep	2011	Los Amigos	Peru		Inga capitata 'subsp.33'	yes
LA2011-579	1	Argidae			MOTU_38	24	Sep	2011	Los Amigos	Peru		Inga capitata 'subsp.33'	yes
LA2011-580	1	Argidae			MOTU_38	24	Sep	2011	Los Amigos	Peru		Inga capitata 'subsp.33'	yes
LA2011-582	1	Argidae			MOTU_38	24	Sep	2011	Los Amigos	Peru		Inga capitata 'subsp.33'	yes	yes	yes	yes
Th-1442	8	Argidae			MOTU_39	13	Sep	2014	Tiputini	Ecuador	2004	Inga ciliata	yes	yes	yes	yes
Th-1443	5	Argidae			MOTU_39	13	Sep	2014	Tiputini	Ecuador	2004	Inga ciliata	yes	yes	yes	yes
LA2010-160	1	Argidae	Ptenos	92	MOTU_40	25	Aug	2010	Los Amigos	Peru		Inga poeppigiana	yes	yes	yes	yes
LA2010-162-1	7	Argidae	Ptenos	92	MOTU_40	26	Aug	2010	Los Amigos	Peru		Inga poeppigiana	yes
LA2010-162-2	1	Argidae	Ptenos	92	MOTU_40	26	Aug	2010	Los Amigos	Peru		Inga poeppigiana	yes
LA2010-185	5	Argidae	Ptenos	92	MOTU_40	28	Aug	2010	Los Amigos	Peru		Inga poeppigiana	yes	yes	yes	yes
Th-1023	3	Argidae			MOTU_41	19	Aug	2014	Tiputini	Ecuador	1489	Zygia swartziana	yes	yes	yes	yes
Th-1287	3	Argidae			MOTU_41	3	Sep	2014	Tiputini	Ecuador	1812	Zygia swartziana	yes
Th-1288	1	Argidae			MOTU_41	3	Sep	2014	Tiputini	Ecuador	1812	Zygia swartziana	yes
Th-1308	4	Argidae			MOTU_41	5	Sep	2014	Tiputini	Ecuador	1839	Zygia 'morphotype mediana'	yes	yes	yes	yes
Th-1369	4	Argidae			MOTU_41	9	Sep	2014	Tiputini	Ecuador	1894	Zygia swartziana	yes
Th-232	6	Argidae			MOTU_41	22	Jul	2013	Tiputini	Ecuador	407	Zygia 'morphotype mediana'	yes
Th-234	8	Argidae			MOTU_41	22	Jul	2013	Tiputini	Ecuador	407	Zygia 'morphotype mediana'	yes	yes	yes	yes
Th-265	9	Argidae			MOTU_41	23	Jul	2013	Tiputini	Ecuador	436	Zygia swartziana	yes	yes	yes	yes
Th-740	1	Argidae			MOTU_41	27	Jul	2014	Tiputini	Ecuador	1016	Zygia 'morphotype mediana'	yes
Th-751	4	Argidae			MOTU_41	30	Jul	2014	Tiputini	Ecuador	1061	Zygia swartziana	yes
Nh-1457	1	Argidae			MOTU_42	11	Aug	2012	Nouragues	French Guiana	11147	Inga marginata	yes
Nh-1459	1	Argidae			MOTU_42	11	Aug	2012	Nouragues	French Guiana	11149	Inga marginata	yes	yes	yes	yes
Nh-1478	1	Argidae			MOTU_42	11	Aug	2012	Nouragues	French Guiana	11162	Inga marginata	yes	yes	yes	yes
Nh-1491	1	Argidae			MOTU_42	11	Aug	2012	Nouragues	French Guiana	11184	Inga marginata	yes
